# Supplementary material
Source: MDPI journal article supplement (https://www.mdpi.com/2073-4441/14/21/3461)
Supplement: s1 [file s1]

# Supplemental information

## Influence of sediment dredging on the distribution of chlorinated paraffin

*Tao Yang<sup>1,2</sup>, Bangping Deng<sup>1,2</sup>, Chenyong Miao<sup>2,3\*</sup>*

1. East China Sea Environment Monitoring Center, State Oceanic Administration, Shanghai 201206, P. R. China
2. Key Laboratory of Marine Ecological Monitoring and Restoration Technologies, MNR, Shanghai 201206, P. R. China
3. Agilent Technologies, Inc., 1350 North Sichuan Road, Shanghai 200080, PR China

\*Corresponding author; email: [Chenyong.Miao@outlook.com](mailto:Chenyong.Miao@outlook.com)

[9 pages](#)

[6 Figures \(S1-S6\)](#)

[1 Table \(S1\)](#)

**Table S1.** The content data of  $\Sigma$ SCCPs,  $\Sigma$ MCCPs,  $\Sigma$ LCCPs, Chlorinity, and TOC in collected samples.

| Sample point | Longitude (° E) | Latitude (° N) | $\Sigma$ SCCPs (ng g <sup>-1</sup> ) | Chlorinity (%) | $\Sigma$ MCCPs (ng g <sup>-1</sup> ) | Chlorinity (%) | $\Sigma$ LCCPs (ng g <sup>-1</sup> ) | Chlorinity (%) | TOC  |
|--------------|-----------------|----------------|--------------------------------------|----------------|--------------------------------------|----------------|--------------------------------------|----------------|------|
| 1            | 121.43          | 31.00          | 101.09                               | 56.70          | 52.93                                | 58.47          | 12.06                                | 60.38          | 0.63 |
| 2            | 121.48          | 31.04          | 464.41                               | 55.70          | 568.89                               | 55.20          | 79.02                                | 48.50          | 0.91 |
| 3            | 121.45          | 31.15          | 841.49                               | 56.26          | 864.27                               | 53.80          | 149.33                               | 41.04          | 0.41 |
| 4            | 121.47          | 31.19          | 262.55                               | 57.28          | 169.07                               | 56.78          | 33.81                                | 49.63          | 0.50 |
| 5            | 121.49          | 31.20          | 135.38                               | 56.39          | 110.36                               | 54.87          | 45.12                                | 41.93          | 0.18 |
| 6            | 121.51          | 31.25          | 586.58                               | 55.80          | 374.01                               | 54.28          | 82.79                                | 43.07          | 0.72 |
| 7            | 121.53          | 31.26          | 209.25                               | 56.28          | 93.30                                | 53.80          | 11.77                                | 41.04          | 0.50 |
| 8            | 121.56          | 31.28          | 308.06                               | 54.23          | 364.46                               | 53.62          | 29.03                                | 45.47          | 0.37 |
| 9            | 121.56          | 31.30          | 378.15                               | 57.43          | 413.51                               | 56.77          | 5.13                                 | 56.77          | 0.42 |
| 10           | 121.55          | 31.33          | 198.56                               | 57.28          | 369.82                               | 57.68          | 50.88                                | 49.96          | 0.62 |
| 11           | 121.57          | 31.38          | 167.13                               | 56.70          | 470.41                               | 49.70          | 13.77                                | 58.95          | 0.60 |
| 12           | 121.60          | 31.36          | 139.17                               | 56.73          | 63.99                                | 56.92          | 8.95                                 | 52.14          | 0.89 |
| 13           | 121.63          | 31.35          | 839.37                               | 55.81          | 1191.54                              | 53.68          | 114.27                               | 40.83          | 0.44 |
| 14           | 121.69          | 31.32          | 34.35                                | 56.86          | 38.16                                | 60.11          | 5.16                                 | 66.29          | 0.53 |
| 15           | 121.71          | 31.30          | 237.76                               | 56.10          | 322.13                               | 54.80          | 215.29                               | 53.20          | 0.58 |
| 16           | 121.70          | 31.38          | 191.87                               | 57.27          | 219.81                               | 59.46          | 29.52                                | 50.33          | 0.23 |
| 17           | 121.74          | 31.34          | 102.58                               | 57.31          | 42.91                                | 56.21          | 4.84                                 | 60.79          | 0.36 |
| 18           | 121.76          | 31.31          | 168.16                               | 57.99          | 73.27                                | 55.62          | 2.54                                 | 55.62          | 0.29 |
| 19           | 121.77          | 31.27          | 214.45                               | 57.43          | 78.19                                | 54.71          | 59.12                                | 39.80          | 0.24 |
| 20           | 121.78          | 31.25          | 54.72                                | 57.60          | 143.17                               | 54.48          | 26.65                                | 41.66          | 0.14 |
| 21           | 121.87          | 31.28          | 1270.70                              | 57.36          | 396.03                               | 51.90          | ND                                   | ND             | 0.42 |
| 22           | 121.93          | 31.25          | 68.00                                | 56.27          | 360.12                               | 52.41          | 12.00                                | 41.00          | 0.38 |

**Continue Table S1**

|    |        |       |        |       |         |       |        |       |      |
|----|--------|-------|--------|-------|---------|-------|--------|-------|------|
| 23 | 122.01 | 31.27 | 362.06 | 56.64 | 506.03  | 53.08 | 9.23   | 49.80 | 0.45 |
| 24 | 122.10 | 31.24 | 395.25 | 58.96 | 768.12  | 52.66 | 24.00  | 35.99 | 0.31 |
| 25 | 122.16 | 31.17 | 659.26 | 57.22 | 288.82  | 52.58 | ND     | ND    | 0.49 |
| 26 | 122.07 | 31.09 | 252.00 | 56.30 | 425.32  | 52.43 | 9.00   | 38.00 | 0.27 |
| 27 | 121.97 | 31.07 | 167.71 | 58.60 | 387.32  | 54.17 | 236.86 | 38.02 | 0.40 |
| 28 | 121.90 | 31.12 | 529.98 | 56.19 | 623.12  | 55.55 | 25.60  | 46.02 | 0.45 |
| 29 | 121.47 | 31.43 | 167.26 | 56.89 | 376.00  | 54.66 | 58.59  | 41.25 | 0.57 |
| 30 | 121.53 | 31.47 | 101.35 | 56.08 | 133.28  | 52.49 | 31.57  | 41.13 | 0.07 |
| 31 | 121.56 | 31.48 | 68.22  | 57.85 | 135.03  | 58.33 | 26.67  | 55.79 | 0.51 |
| 32 | 121.32 | 31.53 | 327.61 | 56.98 | 425.32  | 52.53 | 8.42   | 49.20 | 0.26 |
| 33 | 121.42 | 31.53 | 17.63  | 56.16 | 102.11  | 54.14 | ND     | ND    | 0.54 |
| 34 | 121.45 | 31.59 | 122.54 | 57.04 | 72.87   | 60.60 | 7.15   | 64.08 | 0.63 |
| 35 | 121.85 | 31.63 | 134.21 | 58.61 | 123.04  | 53.66 | 14.43  | 41.58 | 0.25 |
| 36 | 122.00 | 31.70 | 16.09  | 55.66 | 22.03   | 54.00 | ND     | ND    | 0.06 |
| 37 | 122.12 | 31.57 | 75.86  | 57.51 | 84.55   | 53.59 | 6.15   | 42.29 | 0.26 |
| 38 | 122.00 | 31.50 | 89.54  | 56.79 | 1730.78 | 51.95 | ND     | ND    | 0.16 |
| 39 | 122.29 | 31.43 | 328.13 | 57.01 | 158.96  | 52.81 | 3.96   | 52.81 | 0.32 |
| 40 | 122.26 | 31.33 | 83.08  | 55.49 | 57.99   | 55.53 | ND     | ND    | 0.17 |
| 41 | 122.75 | 31.50 | 74.17  | 55.48 | 49.88   | 52.12 | 0.69   | 41.10 | 0.07 |
| 42 | 122.44 | 31.06 | 374.56 | 57.26 | 349.13  | 51.98 | 166.73 | 37.93 | 0.36 |
| 43 | 122.50 | 31.00 | 348.59 | 57.32 | 155.77  | 52.68 | ND     | ND    | 0.42 |
| 44 | 122.25 | 31.00 | 178.05 | 57.12 | 359.21  | 50.70 | ND     | ND    | 0.57 |
| 45 | 122.17 | 30.96 | 495.88 | 57.18 | 30.00   | 52.15 | 1.73   | 42.83 | 0.44 |
| 46 | 122.14 | 30.90 | 17.54  | 55.93 | 275.00  | 50.63 | ND     | ND    | 0.24 |

---

**Continue Table S1**

|    |        |       |        |       |        |       |       |       |      |
|----|--------|-------|--------|-------|--------|-------|-------|-------|------|
| 47 | 122.12 | 30.64 | 179.11 | 57.31 | 307.50 | 51.60 | 77.83 | 39.95 | 0.55 |
| 48 | 122.16 | 30.54 | 193.17 | 57.80 | 275.00 | 48.90 | 0.64  | 48.90 | 0.58 |
| 49 | 122.28 | 30.56 | 138.84 | 56.93 | 633.57 | 52.12 | ND    | ND    | 0.36 |
| 50 | 121.90 | 30.64 | 57.80  | 56.89 | 880.80 | 49.72 | ND    | ND    | 0.42 |
| 51 | 121.94 | 30.68 | 336.79 | 57.09 | 192.84 | 53.01 | ND    | ND    | 0.53 |
| 52 | 121.95 | 30.77 | 330.55 | 55.48 | 602.63 | 50.99 | ND    | ND    | 0.49 |
| 53 | 121.94 | 30.83 | 190.66 | 56.96 | 250.45 | 51.53 | ND    | ND    | 0.57 |
| 54 | 121.87 | 30.84 | 8.76   | 56.19 | 46.12  | 52.43 | ND    | ND    | 0.18 |
| 55 | 121.83 | 30.84 | 322.55 | 56.60 | 544.74 | 53.77 | 97.15 | 44.36 | 0.31 |
| 56 | 121.75 | 30.83 | 307.70 | 57.34 | 271.01 | 52.01 | 12.00 | 32.46 | 0.32 |
| 57 | 121.61 | 30.65 | 112.30 | 57.51 | 33.31  | 53.59 | 1.50  | 42.29 | 0.24 |
| 58 | 121.45 | 30.69 | 136.82 | 55.66 | 155.00 | 52.28 | 11.87 | 39.10 | 0.26 |
| 59 | 121.44 | 30.77 | 253.50 | 56.52 | 170.11 | 57.00 | 20.17 | 44.43 | 0.62 |
| 60 | 121.38 | 30.72 | 250.19 | 56.49 | 204.25 | 57.98 | 10.01 | 46.76 | 0.94 |
| 61 | 121.38 | 30.68 | 361.35 | 58.51 | 366.49 | 52.24 | ND    | ND    | 0.32 |
| 62 | 121.38 | 30.53 | 110.50 | 56.64 | 276.08 | 52.07 | ND    | ND    | 0.30 |

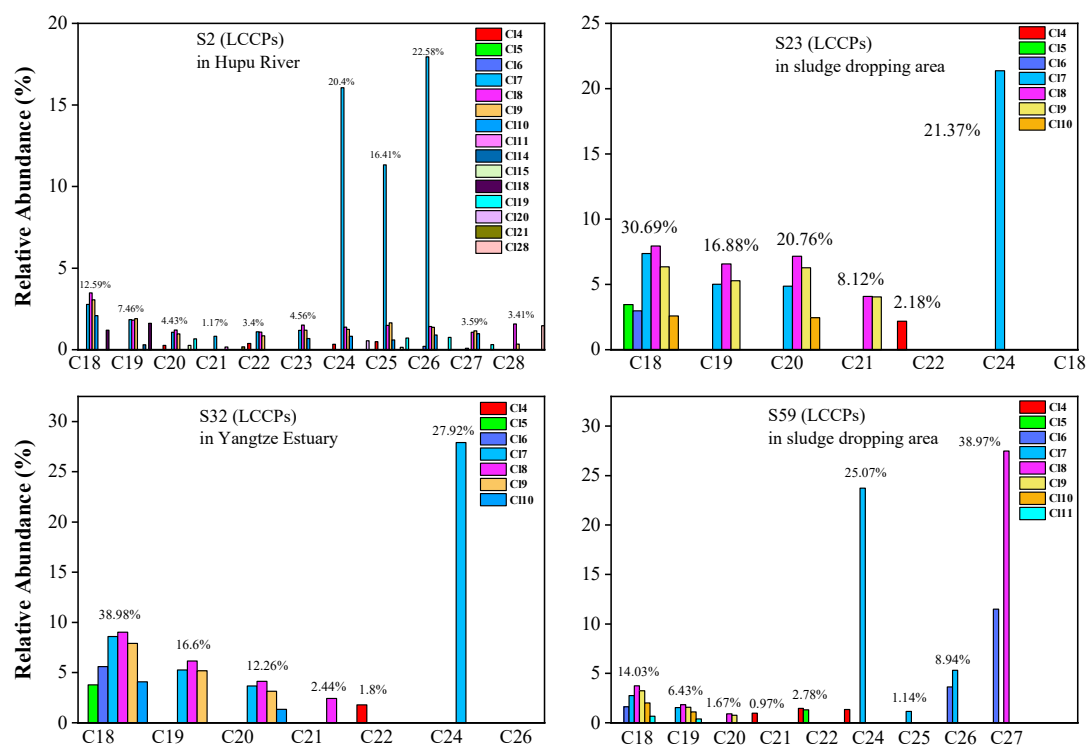

**Figure S1.** Representative congener group abundance profiles of LCCP in surficial sediments collected from the Huangpu River, Yangtze Estuary, and mud dropping area.

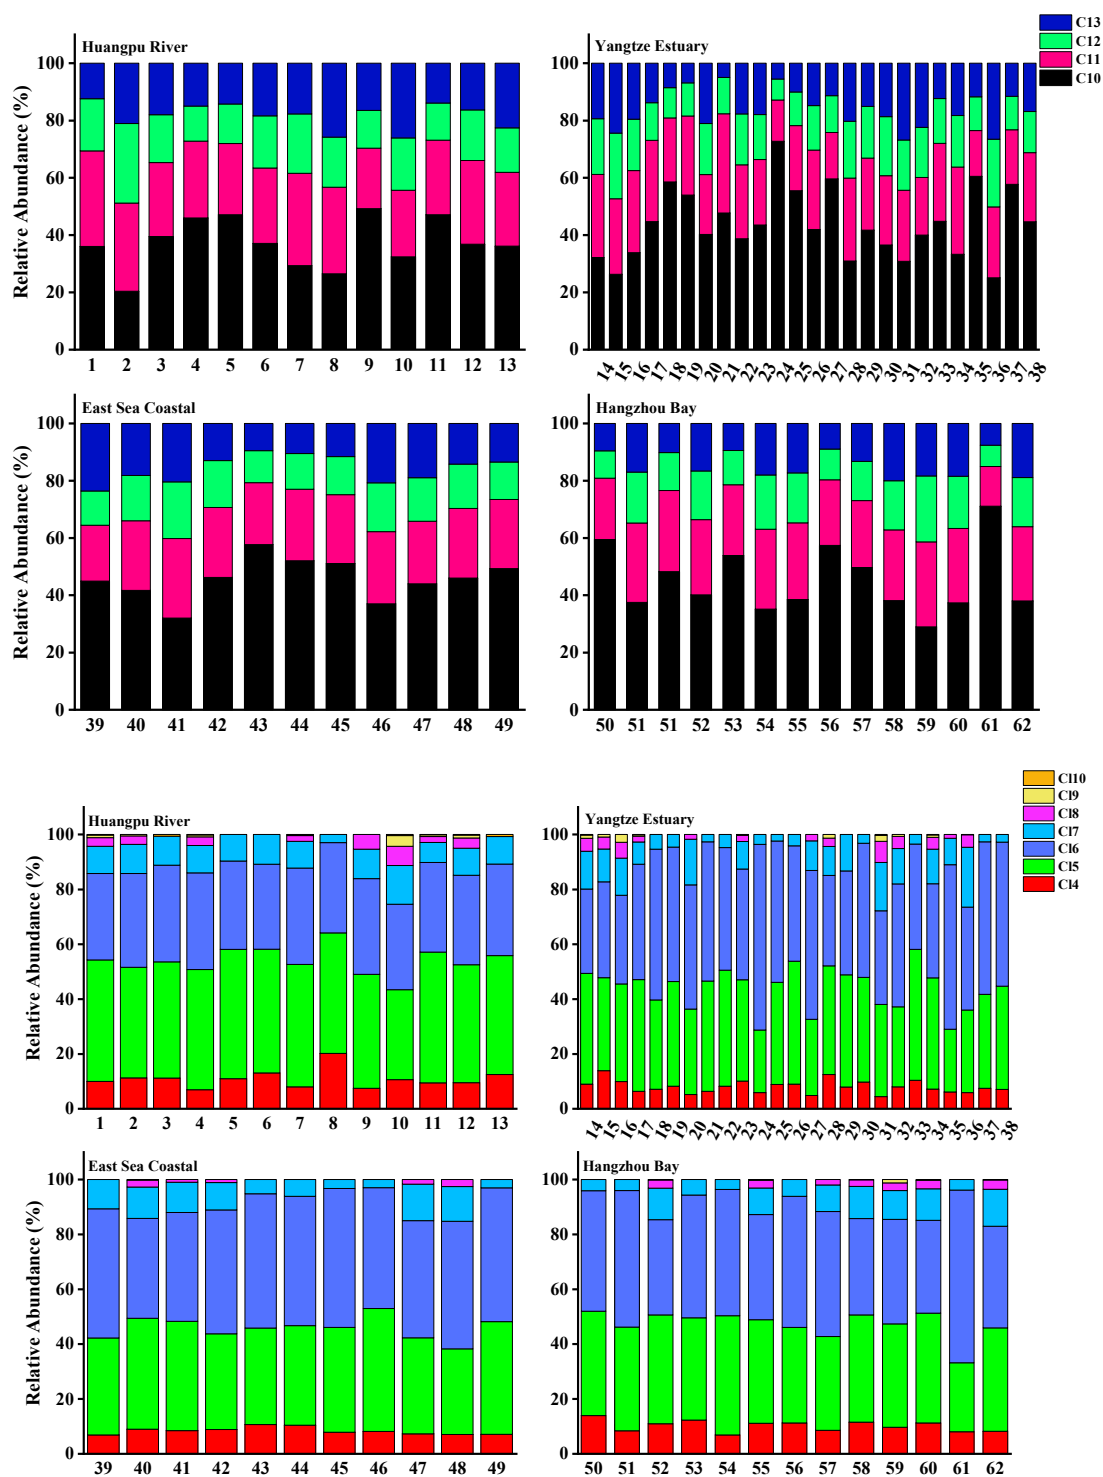

**Figure S2.** Composition profiles of SCCP congeners in the surficial sediments collected from the Huangpu River, Yangtze Estuary, East Sea Coastal, and Hangzhou Bay.

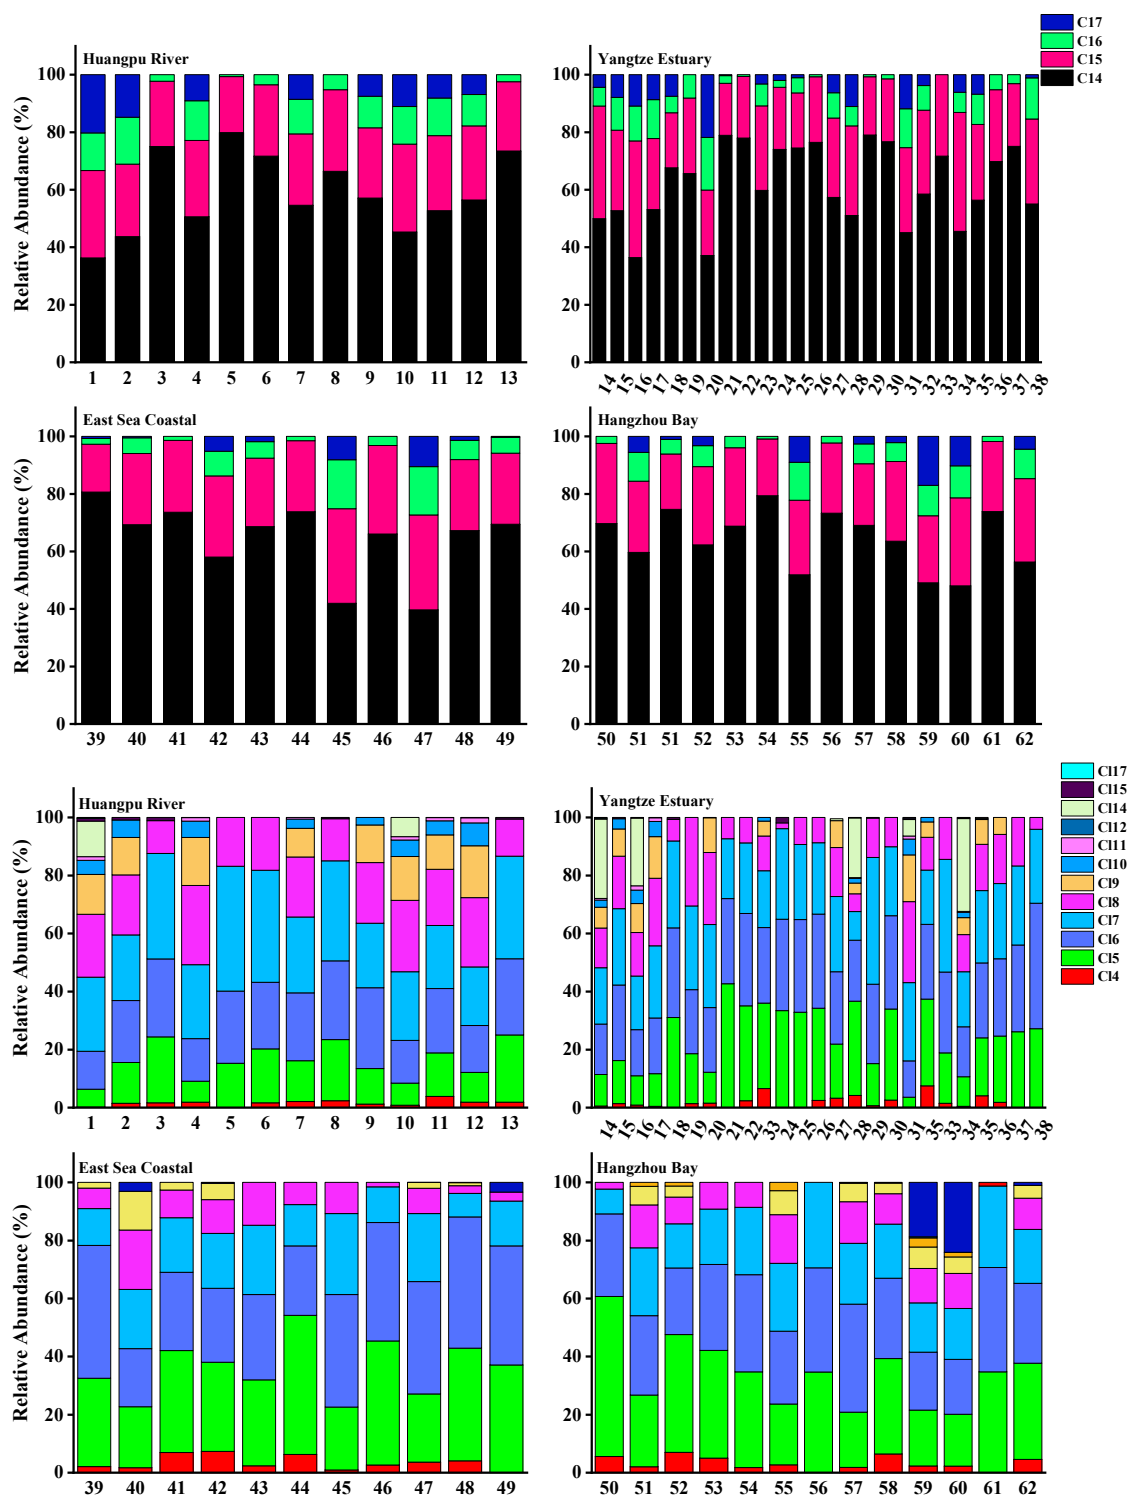

**Figure S3.** Composition profiles of MCCP congeners in the surficial sediments collected from the Huangpu River, Yangtze Estuary, East Sea Coastal, and Hangzhou Bay.

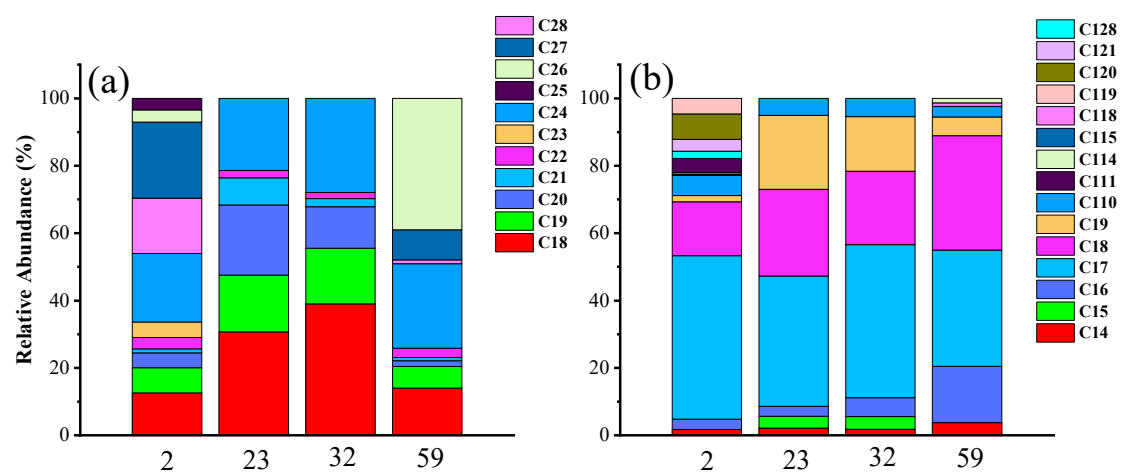

**Figure S4.** Composition profiles of LCCP congeners (carbon (a), chlorine (b)) in the surficial sediments collected from the Huangpu River, Yangtze Estuary, East Sea Coastal, and Hangzhou Bay.



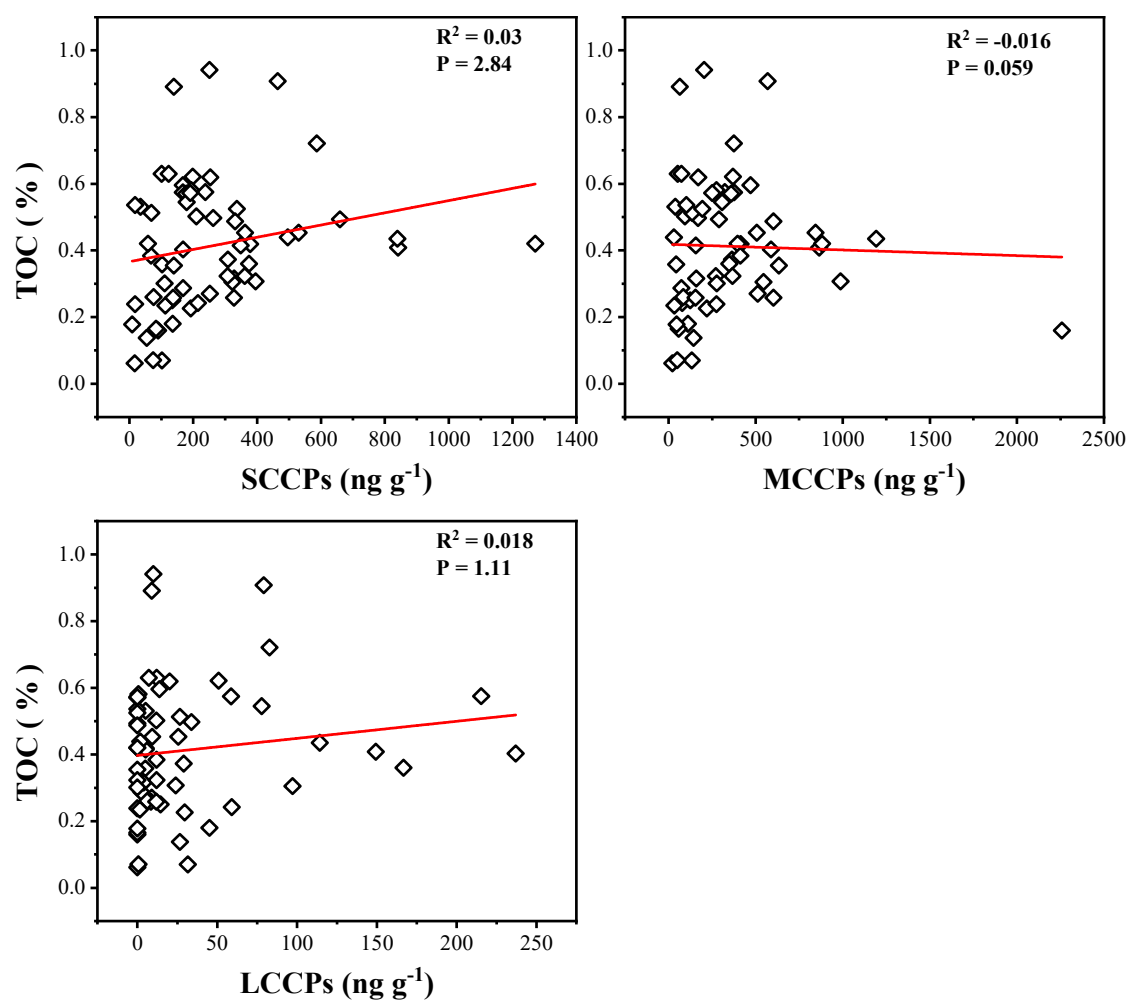

**Figure S5.** The correlation between the contents of  $\Sigma$ SCCP/ $\Sigma$ MCCP/ $\Sigma$ LCCP and TOC (%) in the surficial sediments collected from the Huangpu River, Yangtze Estuary, East Sea Coastal, and Hangzhou Bay.

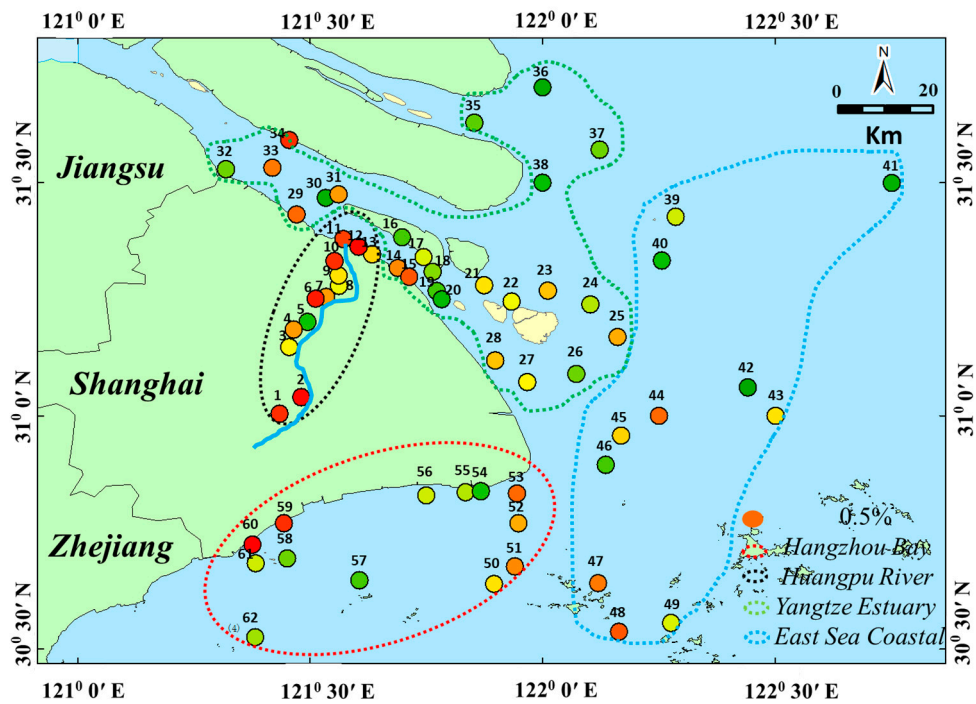

**Figure S6.** The spatial distribution trend of concentrations of TOC (%) detected in the surficial sediments collected from the Huangpu River, Yangtze Estuary, East Sea Coastal, and Hangzhou Bay.
